# Supplementary material
Source: PubMed Central journal article supplement (PMC2917058)
Supplement: kwq099_1.pdf [file kwq099_1.pdf]

## Web Appendix 1

We use a simple, hypothetical situation to illustrate the bias in estimating IRD using first events, based on the commonly used approach as described in the Methods section. Suppose the sample is equally divided into a vaccinated and an unvaccinated group, and there are two strata of equal size in each group. The disease incidence rate is constant over time and, without vaccination, equals to 4 and 6 events per person-year in the low and high risk stratum, respectively. On average, time to first event in the low and high risk groups are therefore  $1/4$  and  $1/6$  year, respectively, in the unvaccinated group. Suppose an intervention causes an absolute reduction of 2 events per person-year, so that the incidence rate is 2 and 4 events per person-year among vaccinated people in the low and high risk stratum, respectively. On average, time to first event in the low and high incidence risk groups are therefore  $1/2$  and  $1/4$  year, respectively, in the vaccinated group. Using all events observed in one year, the estimate for incidence rate in the control group is  $(4 + 6)/2 = 5$  and that in the intervention group is  $(2 + 4)/2 = 3$ . Therefore,  $IRD = 5 - 3 = 2$ , and that's the truth in this case. But suppose only data on time to first event is used, the estimate for incidence rate in the control group is  $2/(1/4 + 1/6) = 4.8$  and that in the vaccine group is  $2/(1/2 + 1/4) = 2.67$ . Therefore,  $IRD = 4.8 - 2.67 = 2.13$ , which is biased upward. It can be shown in the same way that if the intervention causes a proportional reduction in disease incidence (as opposed to absolute reduction), the use of all events to estimate the IRD will remain unbiased whereas the use of first events will be biased downward. In short, in the presence of heterogeneity, the use of all events for

estimating IRD is preferred.

## Web Appendix 2

**Robust variance estimator in the case of  $\mathbf{X}_i = (1, X_{i1})$  and  $X_{i1} = 0, 1$**

In matrix form,

$$\widehat{\text{Var}}(\beta^*) = (\mathbf{X}^T \mathbf{W} \mathbf{X})^{-1} \left( \sum_{i=1}^n Z_i^2 \hat{e}_i^2 \mathbf{X}_i^T \mathbf{X}_i \right) (\mathbf{X}^T \mathbf{W} \mathbf{X})^{-1}$$

Since  $\sum_i X_{i1}^2 Z_i = \sum_i X_{i1} Z_i$ ,

$$\mathbf{X}^T \mathbf{W} \mathbf{X} = \begin{pmatrix} \sum_i Z_i & \sum_i X_{i1} Z_i \\ \sum_i X_{i1} Z_i & \sum_i X_{i1}^2 Z_i \end{pmatrix} = \begin{pmatrix} T_0 + T_1 & T_1 \\ T_1 & T_1 \end{pmatrix},$$

$$(\mathbf{X}^T \mathbf{W} \mathbf{X})^{-1} = \frac{1}{T_0 T_1} \begin{pmatrix} T_1 & -T_1 \\ -T_1 & T_0 + T_1 \end{pmatrix} = \begin{pmatrix} \frac{1}{T_0} & -\frac{1}{T_0} \\ -\frac{1}{T_0} & \frac{1}{T_0} + \frac{1}{T_1} \end{pmatrix}$$

and

$$\sum_i Z_i^2 \hat{e}_i^2 \mathbf{X}_i^T \mathbf{X}_i = \begin{pmatrix} \sum_i Z_i^2 \hat{e}_i^2 & \sum_i X_{i1} Z_i^2 \hat{e}_i^2 \\ \sum_i X_{i1} Z_i^2 \hat{e}_i^2 & \sum_i X_{i1} Z_i^2 \hat{e}_i^2 \end{pmatrix},$$

therefore, the first and second diagonal elements of  $\widehat{\text{Var}}(\beta^*)$  are the variance estimates

for  $\beta_0^*$  and  $\beta_1$ , respectively, i.e.,

$$\widehat{\text{Var}}(\beta_0^*) = \frac{1}{T_0^2} \sum_{\{i: X_{i1}=0\}} Z_i^2 \hat{e}_i^2$$

and

$$\begin{aligned} \widehat{\text{Var}}(\beta_1) &= \frac{1}{T_0^2} \sum_i (1 - X_{i1}) Z_i \hat{e}_{\text{new},i}^2 + \frac{1}{T_1^2} \sum_i X_{i1} Z_i \hat{e}_{\text{new},i}^2 \\ &= \frac{1}{T_0^2} \sum_{\{i: X_{i1}=0\}} Z_i^2 \hat{e}_i^2 + \frac{1}{T_1^2} \sum_{\{i: X_{i1}=1\}} Z_i^2 \hat{e}_i^2 \end{aligned}$$

where  $T_g = \sum_{\{i: X_{i1}=g\}} Z_i$  for  $g = 0$  or  $1$ . Note that the first line in  $\widehat{\text{Var}}(\beta_1)$  is the robust variance estimate for the OLS model that  $Y_{\text{new},i} = Y_i/\sqrt{Z_i}$  and  $X_{\text{new},i1} = \sqrt{Z_i}X_{i1}$  and  $Y_{\text{new},i} = \beta_0^* \sqrt{Z_i} + \beta_1 X_{\text{new},i1} + e_{\text{new},i}$ .

Take  $X_{i1}$  as a group factor to partition the subjects into two groups according to  $X_{i1} = 0$  and  $X_{i1} = 1$ , and assume that  $e_{\text{new},i}$ 's are independently and identically distributed (i.i.d.) within each group, i.e,  $\text{Var}(e_{\text{new},i} \mid X_{i1} = g, Z_i) = \psi_g$  ( $g = 0, 1$ ). Moreover, assume  $E(v_i) = \nu = 0$  such that  $\hat{\beta}_0^* = \hat{\beta}_0$  is the unbiased estimate for the incidence rate when  $X_{i1} = 0$ , then it follows that the unbiased estimate for  $\psi_g$  is the empirical sample variance, i.e.,

$$\hat{\psi}_g = \frac{1}{N_g - 1} \sum_{i=1}^{N_g} \hat{e}_{\text{new},i}^2$$

where  $N_g = \#\{i : X_{i1} = g\}$  such that the variance estimate for the rate difference proposed by Stukel et al. (11) is

$$\widetilde{\text{Var}}(\beta_1) = \frac{1}{T_0} \hat{\psi}_0 + \frac{1}{T_1} \hat{\psi}_1.$$

Therefore, under the i.i.d. assumptions for the  $e_{\text{new},i}$ 's within each level of  $X_{i1}$ , the robust variance estimate  $\widehat{\text{Var}}(\beta_1)$  is consistent with  $\widetilde{\text{Var}}(\beta_1)$ , meaning that  $E\left(\widehat{\text{Var}}(\beta_1) - \widetilde{\text{Var}}(\beta_1)\right) = 0$ , since conditional on  $\mathbf{X}$  and  $\mathbf{Z}$ ,

$$\begin{aligned} E\left(\widehat{\text{Var}}(\beta_1)\right) &= E\left(\frac{1}{T_0^2} \sum_i (1 - X_{i1}) Z_i \hat{e}_{\text{new},i}^2 + \frac{1}{T_1^2} \sum_i X_{i1} Z_i \hat{e}_{\text{new},i}^2\right) \\ &= \frac{1}{T_0^2} \sum_i (1 - X_{i1}) Z_i \psi_0 + \frac{1}{T_1^2} \sum_i X_{i1} Z_i \psi_1 \\ &= \frac{1}{T_0} \psi_0 + \frac{1}{T_1} \psi_1 \\ &= E\left(\widetilde{\text{Var}}(\beta_1)\right). \end{aligned}$$

## Web Appendix 3

### Simulation parameter configurations and data generation processes

Suppose there are  $n$  study subjects. Since  $Y_i$  ( $i = 1, \dots, n$ ) is count data, we generate  $Y_i \sim \text{Poisson}(Z_i(\mathbf{X}_i\beta + v_i))$  where  $v_i$  is the heterogeneity term. Equivalently, the inter-arrival time between two consecutive events for subject  $i$  follows an Exponential distribution with parameter  $\mathbf{X}_i\beta + v_i$ . The data generation process is as follows:

1. Generate the total length of follow-up time  $Z_i$  for subject  $i$  from a Uniform distribution:  $\text{Uniform}(2, 3)$ .
2. Generate  $\mathbf{X}_i = (1, X_{i1}, \dots, X_{ik})$  in two configurations:
  - (a) No confounding, i.e.,  $\mathbf{X}_i = (1, X_{i1})$ :  $X_{i1} \sim \text{Bernoulli}(p)$  where  $p = 0.5$  or  $0.7$ , representing balanced and unbalanced study designs, respectively. Set  $\beta = (1, -0.5)$  and  $(0.05, -0.025)$ . These values mimic the incidence per person-year of common events such as AOM and rare events such as RCP in young children, respectively.
  - (b) One quantitative confounder i.e.,  $\mathbf{X}_i = (1, X_{i1}, X_{i2})$ : set  $\beta = (1, -0.5, 0.05)$  and  $(0.05, -0.025, 0.005)$ .  $X_{i1} \sim \text{Bernoulli}(p)$  where  $p = 0.5$  or  $0.7$ .  $X_{i2} = 5\beta_0 \times \text{Beta}(\alpha_1 + \alpha_2 X_{i1}, \alpha_3)$ . The parameters,  $\alpha_j$  ( $j = 1, 2, 3$ ), of the Beta distribution are chosen to reflect different degrees of collinearity between  $X_{i1}$  and  $X_{i2}$  and different degrees of skewness.  $(\alpha_1, \alpha_2, \alpha_3) = (5, 2, 5)$  and  $(5, 5, 5)$  make  $X_{i2}$  fairly symmetric (skewness are approximately  $-0.2$  and  $-0.5$

for  $\alpha_2 = 2$  and  $\alpha_2 = 5$ , respectively), though not normal. The correlations between  $X_{i1}$  and  $X_{i2}$  for the two settings are about 0.3 (moderate) and 0.5 (strong), respectively. Another two settings  $(\alpha_1, \alpha_2, \alpha_3) = (2, 2, 1)$  and  $(2, 5, 1)$  represent highly skewed distributions (skewness are approximately  $-1.0$  and  $-1.6$  for  $\alpha_2 = 2$  and  $\alpha_2 = 5$ , respectively) where the correlations between  $X_{i1}$  and  $X_{i2}$  are about 0.3 (moderate) and 0.5 (strong), respectively.

3. Generate the heterogeneity term  $v_i$  according to three scenarios:

- (a) homogeneous:  $v_i = 0$ .
- (b) discrete:  $\Pr(v_i = \frac{\beta_0 + \beta_1}{2}) = p$  and  $\Pr(v_i = -\frac{\beta_0 + \beta_1}{2}) = 1 - p$  where  $p$  is same as the Bernoulli probability for  $X_{i1} = 1$ .
- (c) positive and continuous:  $v_i \sim \text{Gamma}(p(1 - p), \beta_0 + \beta_1)$ .

Note that with same  $p$ , the  $v_i$  in scenarios (b) and (c) have the same variance  $p(1 - p)(\beta_0 + \beta_1)^2$ .

4. For the  $i$ -th subject, the  $j$ -th event time is generated using the inversion method  $T_{i,j} = -\ln U / (\mathbf{X}_i \beta + v_i)$  where  $U \sim \text{Uniform}(0, 1)$ . Trivially,  $T_{i,0} = 0$ . Iterate until  $\sum_{\ell \leq J} T_{i,\ell} > Z_i$  and let  $Y_i = m_i = J - 1$ . Estimation using all events is based on  $\{i : \mathbf{X}_i, Z_i, Y_i\}$ . Let  $Y_{i,1} = 1$  and  $Z_{i1} = T_{i1}$  if  $T_{i1} \leq Z_i$ . Otherwise  $Y_{i,1} = 0$  and  $Z_{i1} = Z_i$ . The estimation using first events only is based on  $\{i : \mathbf{X}_i, Z_{i1}, Y_{i1}\}$ .

5. In a main series of simulations the performance of the proposed method using data on all events was evaluated and compared with the estimation using data on

first events and Stukel's method (if without confounder). For the high incidence scenarios with  $\beta_1 = -0.5$ , sample size was set as  $n = 200$  and 1,000. For the low incidence scenarios with  $\beta_1 = -0.025$ , only  $n = 1,000$  was used as no study would use  $n = 200$  for such a rare outcome. The performance of the asymptotic and small-sample versions of the robust standard errors was further studied in more details in a supplementary series of simulations. The total sample size varied from  $n = 100$  to 1,000 at interval of 100 for the high incidence scenarios and  $n = 500$  to 2,000 at interval of 100 for the low incidence scenarios.

## Web Appendix 4

### STATA codes applied to the data in the case study

The proposed estimation approach requires transformations on the following variables:  $y$ : number of events.  $z$ : follow-up time.  $vaccine$ : 1 denotes receiving vaccine and 0 placebo.  $gender$ : 1 denotes male and 0 female.  $age$ : age at enrollment.  $district$ : 1 denotes Bansang, 2 Basse and 3 Others.  $ethnic$ : 1 denotes Mandinka, 2 Fula, 3 Serahule, 4 Wolof and 5 Others.

#### STATA codes:

```
generate y_wls=y/sqrt(z)
```

```
generate x0_wls=sqrt(z)
```

```
generate vaccine_wls=x*sqrt(z)
```

```
generate gender_wls=gender*sqrt(z)
```

```
generate age_wls=age*sqrt(z)
```

```
tabulate district,generate(ind_dist)
```

```
generate ind_dist1_wls=ind_dist1*sqrt(z)
```

```
generate ind_dist2_wls=ind_dist2*sqrt(z)
```



```
tabulate ethnic,generate(ind_eth)
generate ind_eth2_wls=ind_eth2*sqrt(z)
generate ind_eth3_wls=ind_eth3*sqrt(z)
generate ind_eth4_wls=ind_eth4*sqrt(z)
generate ind_eth5_wls=ind_eth5*sqrt(z)
regress y_wls ind_eth2_wls--ind_eth5_wls vaccine_wls ind_dist1_wls ind_dist2_wls age_wls gender_wls x0_wls, nocons vce(robust)
```

Web Table 1. Simulation Results on the Estimates for  $\beta_1$  With High Incidence in the Absence of Confounding ( $n = 200$ ).

| $p$ | $\beta_1$ | $v_i$ | First Events    |                  |                                  |                              | All Events |                  |                                  |                              |                     |                 |
|-----|-----------|-------|-----------------|------------------|----------------------------------|------------------------------|------------|------------------|----------------------------------|------------------------------|---------------------|-----------------|
|     |           |       | Proposed Method |                  |                                  |                              | Avg_est*   | ESD <sup>†</sup> | Proposed Method                  |                              | Stukel              |                 |
|     |           |       | Avg_est*        | ESD <sup>†</sup> | Avg_se <sub>r</sub> <sup>‡</sup> | CP <sub>r</sub> <sup>§</sup> |            |                  | Avg_se <sub>r</sub> <sup>‡</sup> | CP <sub>r</sub> <sup>§</sup> | Avg_se <sup>¶</sup> | CP <sup>#</sup> |
| 0.5 | -0.5      | 0     | -0.5083         | 0.1243           | 0.1220                           | 94.9                         | -0.5002    | 0.0784           | 0.0775                           | 94.8                         | 0.0775              | 94.8            |
|     |           | ±0.25 | -0.5183         | 0.1202           | 0.1185                           | 94.9                         | -0.5001    | 0.0864           | 0.0852                           | 94.6                         | 0.0852              | 94.5            |
|     |           | Gamma | -0.5093         | 0.1367           | 0.1353                           | 94.7                         | -0.5001    | 0.0907           | 0.0909                           | 94.9                         | 0.0908              | 94.9            |
| 0.7 | -0.5      | 0     | -0.5140         | 0.1492           | 0.1465                           | 94.8                         | -0.5010    | 0.0904           | 0.0899                           | 94.5                         | 0.0901              | 94.7            |
|     |           | ±0.25 | -0.5260         | 0.1611           | 0.1581                           | 94.8                         | -0.4987    | 0.1018           | 0.1013                           | 94.4                         | 0.1015              | 94.4            |
|     |           | Gamma | -0.5193         | 0.1638           | 0.1589                           | 94.5                         | -0.4996    | 0.1021           | 0.1014                           | 94.4                         | 0.1016              | 94.4            |

\* Average of the parameter estimates.

† Empirical standard deviation.

‡ Average of the robust standard error estimates.

§ 95% coverage proportion based on the robust standard error estimates.

¶ Average of the standard error estimates using the method proposed by Stukel et al. (11).

# 95% coverage proportion based on the standard error estimates using the method proposed by Stukel et al. (11).

Web Table 2. Simulation Results on the Estimates for  $(\beta_1, \beta_2)$  With High Incidence,  $n = 200$  and  $X_2$

Slightly Skewed.

| $p$              | Coefficient      | $v_i$            | Moderate Collinearity |               |           |            |               |           | Strong Collinearity |               |           |            |               |           |      |
|------------------|------------------|------------------|-----------------------|---------------|-----------|------------|---------------|-----------|---------------------|---------------|-----------|------------|---------------|-----------|------|
|                  |                  |                  | First Events          |               |           | All Events |               |           | First Events        |               |           | All Events |               |           |      |
|                  |                  |                  | Avg_est*              | Avg_se $_r$ † | CP $_r$ ‡ | Avg_est*   | Avg_se $_r$ † | CP $_r$ ‡ | Avg_est*            | Avg_se $_r$ † | CP $_r$ ‡ | Avg_est*   | Avg_se $_r$ † | CP $_r$ ‡ |      |
| 0.5              | $\beta_1 = -0.5$ | 0                | -0.5067               | 0.1440        | 94.8      | -0.4991    | 0.0880        | 94.8      | -0.5094             | 0.1644        | 94.4      | -0.4985    | 0.1006        | 94.6      |      |
|                  |                  | $\pm 0.25$       | -0.5182               | 0.1412        | 95.0      | -0.4997    | 0.0955        | 94.5      | -0.5199             | 0.1607        | 94.6      | -0.5002    | 0.1091        | 94.8      |      |
|                  |                  | Gamma            | -0.5148               | 0.1606        | 95.1      | -0.5003    | 0.1010        | 94.9      | -0.5150             | 0.1844        | 94.6      | -0.4996    | 0.1151        | 94.5      |      |
|                  | $\beta_2 = 0.05$ | 0                | 0.0506                | 0.0912        | 93.9      | 0.0497     | 0.0591        | 94.8      | 0.0492              | 0.1015        | 94.2      | 0.0499     | 0.0642        | 94.6      |      |
|                  |                  | $\pm 0.25$       | 0.0522                | 0.0889        | 94.5      | 0.0513     | 0.0641        | 94.3      | 0.0516              | 0.0990        | 94.2      | 0.0508     | 0.0695        | 94.6      |      |
|                  |                  | Gamma            | 0.0533                | 0.1011        | 94.1      | 0.0508     | 0.0676        | 94.6      | 0.0520              | 0.1119        | 94.3      | 0.0498     | 0.0732        | 94.3      |      |
|                  | 0.7              | $\beta_1 = -0.5$ | 0                     | -0.5128       | 0.1682    | 94.6       | -0.4998       | 0.0997    | 94.5                | -0.5181       | 0.1844    | 94.5       | -0.5005       | 0.1107    | 94.3 |
|                  |                  |                  | $\pm 0.25$            | -0.5266       | 0.1805    | 94.8       | -0.4990       | 0.1107    | 94.5                | -0.5314       | 0.1986    | 94.4       | -0.4999       | 0.1237    | 94.5 |
|                  |                  |                  | Gamma                 | -0.5199       | 0.1874    | 94.7       | -0.4995       | 0.1112    | 94.4                | -0.5224       | 0.2046    | 94.5       | -0.5000       | 0.1236    | 94.1 |
| $\beta_2 = 0.05$ |                  | 0                | 0.0490                | 0.0845        | 94.3      | 0.0495     | 0.0569        | 94.5      | 0.0491              | 0.0967        | 94.2      | 0.0495     | 0.0639        | 94.5      |      |
|                  |                  | $\pm 0.25$       | 0.0525                | 0.0918        | 94.8      | 0.0505     | 0.0645        | 94.2      | 0.0515              | 0.1051        | 94.5      | 0.0500     | 0.0723        | 94.8      |      |
|                  |                  | Gamma            | 0.0513                | 0.0926        | 94.1      | 0.0506     | 0.0646        | 94.2      | 0.0500              | 0.1060        | 93.9      | 0.0503     | 0.0724        | 94.5      |      |

\* Average of the parameter estimates.

† Average of the robust standard error estimates.

‡ 95% coverage proportion based on the robust standard error estimates.

Web Table 3. Simulation Results on the Estimates for  $(\beta_1, \beta_2)$  With High Incidence,  $n = 200$  and  $X_2$

Highly Skewed.

| $p$              | Coefficient      | $v_i$            | Moderate Collinearity |                       |                   |            |                       |                   | Strong Collinearity |                       |                   |            |                       |                   |      |
|------------------|------------------|------------------|-----------------------|-----------------------|-------------------|------------|-----------------------|-------------------|---------------------|-----------------------|-------------------|------------|-----------------------|-------------------|------|
|                  |                  |                  | First Events          |                       |                   | All Events |                       |                   | First Events        |                       |                   | All Events |                       |                   |      |
|                  |                  |                  | Avg.est*              | Avg.se <sub>r</sub> † | CP <sub>r</sub> ‡ | Avg.est*   | Avg.se <sub>r</sub> † | CP <sub>r</sub> ‡ | Avg.est*            | Avg.se <sub>r</sub> † | CP <sub>r</sub> ‡ | Avg.est*   | Avg.se <sub>r</sub> † | CP <sub>r</sub> ‡ |      |
| 0.5              | $\beta_1 = -0.5$ | 0                | -0.5066               | 0.1537                | 95.1              | -0.4996    | 0.0919                | 94.7              | -0.5100             | 0.1737                | 94.6              | -0.5002    | 0.1028                | 94.4              |      |
|                  |                  | $\pm 0.25$       | -0.5205               | 0.1511                | 95.0              | -0.4988    | 0.0993                | 94.7              | -0.5210             | 0.1710                | 94.8              | -0.5016    | 0.1106                | 94.9              |      |
|                  |                  | Gamma            | -0.5120               | 0.1685                | 94.5              | -0.4999    | 0.1045                | 94.6              | -0.5145             | 0.1902                | 95.1              | -0.5011    | 0.1161                | 94.8              |      |
|                  | $\beta_2 = 0.05$ | 0                | 0.0475                | 0.0700                | 94.5              | 0.0499     | 0.0436                | 94.6              | 0.0470              | 0.0835                | 94.1              | 0.0500     | 0.0498                | 94.3              |      |
|                  |                  | $\pm 0.25$       | 0.0492                | 0.0687                | 94.7              | 0.0501     | 0.0470                | 94.8              | 0.0481              | 0.0820                | 93.8              | 0.0505     | 0.0534                | 94.4              |      |
|                  |                  | Gamma            | 0.0484                | 0.0772                | 94.2              | 0.0505     | 0.0494                | 94.5              | 0.0480              | 0.0913                | 94.3              | 0.0510     | 0.0559                | 94.0              |      |
|                  | 0.7              | $\beta_1 = -0.5$ | 0                     | -0.5180               | 0.1776            | 94.6       | -0.4998               | 0.1037            | 94.4                | -0.5173               | 0.1986            | 94.2       | -0.4999               | 0.1160            | 94.2 |
|                  |                  |                  | $\pm 0.25$            | -0.5272               | 0.1907            | 94.4       | -0.4980               | 0.1150            | 94.0                | -0.5370               | 0.2140            | 94.1       | -0.4997               | 0.1283            | 94.1 |
|                  |                  |                  | Gamma                 | -0.5261               | 0.1926            | 94.8       | -0.5017               | 0.1149            | 94.2                | -0.5257               | 0.2145            | 93.9       | -0.5003               | 0.1285            | 93.9 |
| $\beta_2 = 0.05$ |                  | 0                | 0.0482                | 0.0684                | 94.3              | 0.0499     | 0.0446                | 94.4              | 0.0468              | 0.0897                | 93.6              | 0.0505     | 0.0555                | 94.1              |      |
|                  |                  | $\pm 0.25$       | 0.0485                | 0.0742                | 94.3              | 0.0501     | 0.0500                | 94.5              | 0.0480              | 0.0967                | 93.7              | 0.0493     | 0.0617                | 94.1              |      |
|                  |                  | Gamma            | 0.0476                | 0.0749                | 94.8              | 0.0497     | 0.0500                | 94.3              | 0.0453              | 0.0973                | 93.9              | 0.0491     | 0.0617                | 94.4              |      |

\* Average of the parameter estimates.

† Average of the robust standard error estimates.

‡ 95% coverage proportion based on the robust standard error estimates.
